# Supplementary material for: Comparative Genomics and Disorder Prediction Identify Biologically Relevant SH3 Protein Interactions
Source: PLOS journal article supplement (doi:10.1371/journal.pcbi.0010026), 2005-08-10
Supplement: S3 (10.1371/journal.pcbi.0010026.s003) [file journal.pcbi.0010026.s003]

Supplementary table III - **Effect of addition of more informative genomes on accuracy and coverage scores.** We calculated the accuracy and coverage after addition of *N. crassa* and *S. pombe* genomes, for different conservation scores. The analysis is only for putative target motifs within predicted unstructured protein regions in the *S. cerevisiae* proteome and for a probing region of 210.

|                                | Calculated with Gold Positives<br>(Total Positives =59) |    |    |                |      | Calculated with Platinum<br>Positives (Total Positives =19) |    |    |                |      |
|--------------------------------|---------------------------------------------------------|----|----|----------------|------|-------------------------------------------------------------|----|----|----------------|------|
|                                | Total                                                   | TP | FP | TP/(T<br>P+FP) | TP/P | Total                                                       | TP | FP | TP/(T<br>P+FP) | TP/P |
| Conserved in 1<br>of 5 genomes | 208                                                     | 38 | 55 | 0.41           | 0.64 | 110                                                         | 11 | 30 | 0.27           | 0.58 |
| Conserved in 1<br>of 6 genomes | 215                                                     | 38 | 58 | 0.40           | 0.64 | 115                                                         | 11 | 31 | 0.26           | 0.58 |
| Conserved in 1<br>of 7 genomes | 216                                                     | 38 | 58 | 0.40           | 0.64 | 115                                                         | 11 | 31 | 0.26           | 0.58 |
| Conserved in 2<br>of 5 genomes | 136                                                     | 33 | 30 | 0.52           | 0.56 | 82                                                          | 10 | 18 | 0.36           | 0.53 |
| Conserved in 2<br>of 6 genomes | 140                                                     | 34 | 31 | 0.52           | 0.58 | 85                                                          | 11 | 18 | 0.38           | 0.58 |
| Conserved in 2<br>of 7 genomes | 145                                                     | 34 | 34 | 0.50           | 0.58 | 87                                                          | 11 | 20 | 0.35           | 0.58 |
| Conserved in 3<br>of 5 genomes | 86                                                      | 21 | 13 | 0.62           | 0.36 | 52                                                          | 7  | 7  | 0.50           | 0.37 |
| Conserved in 3<br>of 6 genomes | 89                                                      | 23 | 13 | 0.64           | 0.39 | 54                                                          | 8  | 7  | 0.53           | 0.42 |
| Conserved in 3<br>of 7 genomes | 92                                                      | 24 | 13 | 0.65           | 0.41 | 56                                                          | 9  | 7  | 0.56           | 0.47 |
| Conserved in 4<br>of 5 genomes | 61                                                      | 20 | 6  | 0.77           | 0.34 | 38                                                          | 5  | 2  | 0.71           | 0.26 |
| Conserved in 4<br>of 6 genomes | 67                                                      | 21 | 8  | 0.72           | 0.36 | 43                                                          | 6  | 3  | 0.67           | 0.32 |
| Conserved in 4<br>of 7 genomes | 69                                                      | 22 | 8  | 0.73           | 0.37 | 43                                                          | 6  | 3  | 0.67           | 0.32 |
| Conserved in 5<br>of 5 genomes | 30                                                      | 17 | 1  | 0.94           | 0.29 | 20                                                          | 3  | 0  | 1              | 0.16 |
| Conserved in 5<br>of 6 genomes | 40                                                      | 20 | 3  | 0.87           | 0.34 | 28                                                          | 5  | 0  | 1              | 0.26 |
| Conserved in 5<br>of 7 genomes | 45                                                      | 20 | 4  | 0.83           | 0.34 | 30                                                          | 5  | 0  | 1              | 0.26 |
