# Supplementary material for: Comparative Genomics and Disorder Prediction Identify Biologically Relevant SH3 Protein Interactions
Source: PLOS journal article supplement (doi:10.1371/journal.pcbi.0010026), 2005-08-10
Supplement: S4 (10.1371/journal.pcbi.0010026.s004) [file journal.pcbi.0010026.s004]

Supplementary table IV – **List of predicted interactions.** We considered that a potential target consensus, found by pattern matching, in an *S. cerevisiae* protein would be biologically relevant if it was within an unstructured region of the *S. cerevisiae* protein and also conserved in four of the six genomes used. We used the genomes of *C. glabrata*, *K. lactis*, *C. albicans*, *D. hansenii*, *Y. lipolytica* and *N. crassa* because these species diverged from *S. cerevisiae* at a time that falls within the optimal range proposed in our analysis. We retrieved function and localization information from MIPS (Mewes, Frishman et al. 2000) and SGD databases.

| SH3 protein | Localization          | Function                                                                                                                                                                | Target protein | Localization                                       | Function                                                                                                                                                                                                                                  | Target binding positions                 | Accuracy % |
|-------------|-----------------------|-------------------------------------------------------------------------------------------------------------------------------------------------------------------------|----------------|----------------------------------------------------|-------------------------------------------------------------------------------------------------------------------------------------------------------------------------------------------------------------------------------------------|------------------------------------------|------------|
| LSB1        | cytoplasm<br>nucleus  | biological_process<br>unknown;intracellular signalling;                                                                                                                 | ABP1           | cytoplasm actin<br>cytoskeleton                    | cytoskeleton organization and biogenesis;assembly of protein complexes;protein binding;cell growth ;actin cytoskeleton;budding;                                                                                                           | 446-456                                  | 83%        |
| LSB1        | cytoplasm<br>nucleus  | biological_process<br>unknown;intracellular signalling;                                                                                                                 | APP1           | cytoplasm actin<br>cytoskeleton<br>nucleus         | cytoskeleton organization and biogenesis;cell growth ;actin cytoskeleton;budding;                                                                                                                                                         | 505-515                                  | 83%        |
| LSB1        | cytoplasm<br>nucleus  | biological_process<br>unknown;intracellular signalling;                                                                                                                 | YBP2           | cytoplasm                                          | -                                                                                                                                                                                                                                         | 537-547                                  |            |
| LSB1        | cytoplasm<br>nucleus  | biological_process<br>unknown;intracellular signalling;                                                                                                                 | LAS17          | cytoplasm actin<br>cytoskeleton                    | cytokinesis; ;assembly of protein complexes;protein binding;endocytosis;osmotic and salt stress response;cell growth ;actin cytoskeleton;budding;                                                                                         | 311-321<br>323-333<br>352-362<br>384-394 | 83%        |
| LSB1        | cytoplasm<br>nucleus  | biological_process<br>unknown;intracellular signalling;                                                                                                                 | CUE5           | cytoplasm                                          | -                                                                                                                                                                                                                                         | 337-347                                  | 73%        |
| LSB1        | cytoplasm<br>nucleus  | biological_process<br>unknown;intracellular signalling;                                                                                                                 | GYP5           | bud neck cell<br>periphery<br>cytoplasm            | vesicle-mediated transport;GTPase activator ;vacuolar transport;                                                                                                                                                                          | 279-289<br>293-303                       | 83%        |
| LSB1        | cytoplasm<br>nucleus  | biological_process<br>unknown;intracellular signalling;                                                                                                                 | APP2           | bud neck<br>cytoplasm<br>mitochondria              | cytoskeleton organization and biogenesis;actin cytoskeleton;                                                                                                                                                                              | 200-210                                  | 83%        |
| LSB1        | cytoplasm<br>nucleus  | biological_process<br>unknown;intracellular signalling;                                                                                                                 | GTS1           | cytoplasm actin<br>cytoskeleton<br>nucleus         | morphogenesis;mitotic cell cycle and cell cycle control;transcriptional activator;drug transport;stress response;rhythm ;cell growth ;cell aging;budding;development of asco;                                                             | 247-257                                  | 73%        |
| LSB1        | cytoplasm<br>nucleus  | biological_process<br>unknown;intracellular signalling;                                                                                                                 | YIL108W        | cytoplasm                                          | -                                                                                                                                                                                                                                         | 577-587                                  | 73%        |
| LSB1        | cytoplasm<br>nucleus  | biological_process<br>unknown;intracellular signalling;                                                                                                                 | YDL146W        | bud neck cell<br>periphery<br>cytoplasm<br>nucleus | -                                                                                                                                                                                                                                         | 477-487                                  | 73%        |
| MYO5        | actin<br>cytoskeleton | cell wall organization and biogenesis;conversion to kinetic energy ;cytoskeleton;exocytosis;endocytosis;osmotic and salt stress response;osmosensing;cell wall;budding; | SRV2           | cell periphery<br>actin<br>cytoskeleton            | cytoskeleton organization and biogenesis;metabolism of cyclic and unusual nucleotides;protein binding;small GTPase mediated signal transduction;cell growth ;cytoskeleton;budding;                                                        | 276-286                                  | 83%        |
| MYO5        | actin<br>cytoskeleton | cell wall organization and biogenesis;conversion to kinetic energy ;cytoskeleton;exocytosis;endocytosis;osmotic and salt stress response;osmosensing;cell wall;budding; | FAR11          | ambiguous                                          | cell cycle;conjugation;cell cycle arrest;pheromone response;                                                                                                                                                                              | 520-530                                  | 73%        |
| MYO5        | actin<br>cytoskeleton | cell wall organization and biogenesis;conversion to kinetic energy ;cytoskeleton;exocytosis;endocytosis;osmotic and salt stress response;osmosensing;cell wall;budding; | BNI1           | neck neck<br>cytoplasm<br>cytoskeleton             | response to stress;cytokinesis ;spindle pole body;protein binding;structural protein;RNA transport;small GTPase mediated signal transduction;osmotic and salt stress response;pheromone response;cell growth ;actin cytoskeleton;budding; | 1238-1248<br>1277-1287                   | 83%        |
| MYO5        | actin                 | cell wall organization and                                                                                                                                              | VRP1           | cytoplasm actin                                    | vesicle-mediated transport;response                                                                                                                                                                                                       | 4-14                                     | 83%        |

|       |                              |                                                                                                                                                                         |       |                                        |                                                                                                                                                                                                                     |                    |     |
|-------|------------------------------|-------------------------------------------------------------------------------------------------------------------------------------------------------------------------|-------|----------------------------------------|---------------------------------------------------------------------------------------------------------------------------------------------------------------------------------------------------------------------|--------------------|-----|
|       | cytoskeleton                 | biogenesis;conversion to kinetic energy ;cytoskeleton;exocytosis;endocytosis;osmotic and salt stress response;osmosensing;cell wall;budding;                            |       | cytoskeleton                           | to stress;budding;protein binding;endocytosis;osmotic and salt stress response;cell growth ;actin cytoskeleton;                                                                                                     | 234-244<br>395-405 |     |
| MYO5  | actin cytoskeleton           | cell wall organization and biogenesis;conversion to kinetic energy ;cytoskeleton;exocytosis;endocytosis;osmotic and salt stress response;osmosensing;cell wall;budding; | BNR1  | neck cell periphery actin cytoskeleton | response to stress;budding;protein binding;osmotic and salt stress response;cell growth ;actin cytoskeleton;                                                                                                        | 765-775<br>819-829 | 83% |
| YSC84 | cytoplasm cytoskeleton       | vesicle-mediated transport;endocytosis;cell growth ;actin cytoskeleton;budding;                                                                                         | ABP1  | cytoplasm actin cytoskeleton           | cytoskeleton organization and biogenesis;assembly of protein complexes;protein binding;cell growth ;actin cytoskeleton;budding;                                                                                     | 447-457            | 83% |
| YSC84 | cytoplasm cytoskeleton       | vesicle-mediated transport;endocytosis;cell growth ;actin cytoskeleton;budding;                                                                                         | APP1  | cytoplasm actin cytoskeleton nucleus   | cytoskeleton organization and biogenesis;cell growth ;actin cytoskeleton;budding;                                                                                                                                   | 506-516            | 83% |
| YSC84 | cytoplasm cytoskeleton       | vesicle-mediated transport;endocytosis;cell growth ;actin cytoskeleton;budding;                                                                                         | CDC14 | nucleus nucleolus                      | phosphate utilization;DNA synthesis and replication;mitotic cell cycle and cell cycle control;modification by phosphorylation;                                                                                      | 121-131            | 73% |
| YSC84 | cytoplasm cytoskeleton       | vesicle-mediated transport;endocytosis;cell growth ;actin cytoskeleton;budding;                                                                                         | GTS1  | cytoplasm actin cytoskeleton nucleus   | morphogenesis;mitotic cell cycle and cell cycle control;transcriptional activator;drug transport;stress response;rhythm ;cell growth ;cell aging;budding;development of asco;                                       | 248-258            | 73% |
| YSC84 | cytoplasm cytoskeleton       | vesicle-mediated transport;endocytosis;cell growth ;actin cytoskeleton;budding;                                                                                         | CUE5  | cytoplasm                              | -                                                                                                                                                                                                                   | 338-348            | 83% |
| YSC84 | cytoplasm cytoskeleton       | vesicle-mediated transport;endocytosis;cell growth ;actin cytoskeleton;budding;                                                                                         | GYP5  | bud neck cell periphery cytoplasm      | vesicle-mediated transport;GTPase activator ;vacuolar transport;                                                                                                                                                    | 280-290<br>294-304 | 83% |
| HSE1  | endosome                     | transport;protein targeting;protein binding;vacuolar transport;                                                                                                         | BCK1  | cytoplasm                              | phosphate utilization;mitotic cell cycle and cell cycle control;modification by phosphorylation;MAPKKK cascade;stress response;perception of nutrients and nutritional adaptation;directional cell growth ;budding; | 803-813            | 83% |
| HSE1  | endosome                     | transport;protein targeting;protein binding;vacuolar transport;                                                                                                         | LAS17 | cytoplasm actin cytoskeleton           | cytokinesis;assembly of protein complexes;protein binding;endocytosis;osmotic and salt stress response;cell growth ;actin cytoskeleton;budding;                                                                     | 308-318<br>319-329 | 83% |
| HSE1  | endosome                     | transport;protein targeting;protein binding;vacuolar transport;                                                                                                         | STE20 | bud cytoplasm                          | pseudohyphal growth;phosphate utilization;modification by phosphorylation;transmembrane signal transduction;pheromone response;cell growth ;cytoskeleton;budding;                                                   | 471-481            | 83% |
| ABP1  | cytoplasm actin cytoskeleton | cytoskeleton organization and biogenesis;assembly of protein complexes;protein binding;cell growth ;actin cytoskeleton;budding;                                         | SRV2  | cell periphery actin cytoskeleton      | cytoskeleton organization and biogenesis;metabolism of cyclic and unusual nucleotides;protein binding;small GTPase mediated signal transduction;cell growth ;budding;                                               | 351-361            | 83% |
| ABP1  | cytoplasm actin cytoskeleton | cytoskeleton organization and biogenesis;assembly of protein complexes;protein binding;cell growth ;actin cytoskeleton;budding;                                         | DNF2  | bud cell periphery plasma membrane     | peptide transport;protein transport;lipid transport;transport ATPases;                                                                                                                                              | 1468-1478          | 73% |
| ABP1  | cytoplasm actin cytoskeleton | cytoskeleton organization and biogenesis;assembly of protein complexes;protein binding;cell growth ;actin cytoskeleton;budding;                                         | PRK1  | cytoplasm actin cytoskeleton           | cytokinesis;phosphate utilization;mitotic cell cycle and cell cycle control;modification by phosphorylation;assembly of protein complexes;endocytosis;actin cytoskeleton;budding;                                   | 746-756            | 73% |

|      |                                                                     |                                                                                                                                 |         |                                                       |                                                                                                                                                    |                    |     |
|------|---------------------------------------------------------------------|---------------------------------------------------------------------------------------------------------------------------------|---------|-------------------------------------------------------|----------------------------------------------------------------------------------------------------------------------------------------------------|--------------------|-----|
| ABP1 | cytoplasm<br>actin<br>cytoskeleton                                  | cytoskeleton organization and biogenesis;assembly of protein complexes;protein binding;cell growth ;actin cytoskeleton;budding; | HUA1    | cytoplasm<br>nucleus                                  | cytoskeleton organization and biogenesis;assembly of protein complexes;cell growth ;actin cytoskeleton;budding;                                    | 70-80              | 83% |
| ABP1 | cytoplasm<br>actin<br>cytoskeleton                                  | cytoskeleton organization and biogenesis;assembly of protein complexes;protein binding;cell growth ;actin cytoskeleton;budding; | YIR003W | cytoplasm actin<br>cytoskeleton                       | -                                                                                                                                                  | 3-13<br>386-396    | 73% |
| ABP1 | cytoplasm<br>actin<br>cytoskeleton                                  | cytoskeleton organization and biogenesis;assembly of protein complexes;protein binding;cell growth ;actin cytoskeleton;budding; | ARK1    | cytoplasm actin<br>cytoskeleton                       | cytokinesis;phosphate utilization;modification by phosphorylation;assembly of protein complexes;endocytosis;actin cytoskeleton;budding;            | 605-615<br>616-626 | 83% |
| ABP1 | cytoplasm<br>actin<br>cytoskeleton                                  | cytoskeleton organization and biogenesis;assembly of protein complexes;protein binding;cell growth ;actin cytoskeleton;budding; | DNF1    | plasma<br>membrane<br>cytoplasm golgi<br>mitochondria | peptide transport;protein transport;lipid transport;transport ATPases;                                                                             | 1425-1435          | 73% |
| ABP1 | cytoplasm<br>actin<br>cytoskeleton                                  | cytoskeleton organization and biogenesis;assembly of protein complexes;protein binding;cell growth ;actin cytoskeleton;budding; | SLA1    | cytoplasm actin<br>cytoskeleton<br>nucleus            | cell wall organization and biogenesis;assembly of protein complexes;protein binding;endocytosis;cell growth ;cell wall;actin cytoskeleton;budding; | 191-201            | 83% |
| BBC1 | cytoplasm                                                           | cytoskeleton organization and biogenesis;protein binding;actin cytoskeleton;                                                    | HUA1    | cytoplasm<br>nucleus                                  | cytoskeleton organization and biogenesis;assembly of protein complexes;cell growth ;actin cytoskeleton;budding;                                    | 73-83              | 73% |
| BBC1 | cytoplasm                                                           | cytoskeleton organization and biogenesis;protein binding;actin cytoskeleton;                                                    | RPO21   | nucleus nucleus<br>mitochondria                       | transcription;general transcription activities;DNA binding;                                                                                        | 241-251            | 83% |
| BBC1 | cytoplasm                                                           | cytoskeleton organization and biogenesis;protein binding;actin cytoskeleton;                                                    | LAS17   | cytoplasm actin<br>cytoskeleton                       | cytokinesis;assembly of protein complexes;protein binding;endocytosis;osmotic and salt stress response;cell growth ;actin cytoskeleton;budding;    | 346-356<br>379-389 | 73% |
| LSB3 | neck cell<br>periphery<br>cytoplasm<br>cytoskeleton<br>mitochondria | cytoskeleton organization and biogenesis;actin cytoskeleton;                                                                    | ABP1    | cytoplasm actin<br>cytoskeleton                       | cytoskeleton organization and biogenesis;assembly of protein complexes;protein binding;cell growth ;actin cytoskeleton;budding;                    | 446-456            | 83% |
| LSB3 | neck cell<br>periphery<br>cytoplasm<br>cytoskeleton<br>mitochondria | cytoskeleton organization and biogenesis;actin cytoskeleton;                                                                    | APP1    | cytoplasm actin<br>cytoskeleton<br>nucleus            | cytoskeleton organization and biogenesis;cell growth ;actin cytoskeleton;budding;                                                                  | 505-515            | 83% |
| LSB3 | neck cell<br>periphery<br>cytoplasm<br>cytoskeleton<br>mitochondria | cytoskeleton organization and biogenesis;actin cytoskeleton;                                                                    | LAS17   | cytoplasm actin<br>cytoskeleton                       | cytokinesis;assembly of protein complexes;protein binding;endocytosis;osmotic and salt stress response;cell growth ;actin cytoskeleton;budding;    | 311-321            | 83% |
| LSB3 | neck cell<br>periphery<br>cytoplasm<br>cytoskeleton<br>mitochondria | cytoskeleton organization and biogenesis;actin cytoskeleton;                                                                    | CUE5    | cytoplasm                                             | -                                                                                                                                                  | 337-347            | 83% |
| LSB3 | neck cell<br>periphery<br>cytoplasm<br>cytoskeleton<br>mitochondria | cytoskeleton organization and biogenesis;actin cytoskeleton;                                                                    | GYP5    | bud neck cell<br>periphery<br>cytoplasm               | vesicle-mediated transport;GTPase activator ;vacuolar transport;                                                                                   | 293-303            | 83% |
| LSB3 | neck cell<br>periphery<br>cytoplasm<br>cytoskeleton<br>mitochondria | cytoskeleton organization and biogenesis;actin cytoskeleton;                                                                    | APP2    | bud neck<br>cytoplasm<br>mitochondria                 | cytoskeleton organization and biogenesis;actin cytoskeleton;                                                                                       | 200-210            | 83% |
| LSB3 | neck cell<br>periphery<br>cytoplasm<br>cytoskeleton<br>mitochondria | cytoskeleton organization and biogenesis;actin cytoskeleton;                                                                    | CDC14   | nucleus<br>nucleolus                                  | phosphate utilization;DNA synthesis and replication;mitotic cell cycle and cell cycle control;modification by phosphorylation;                     | 120-130            | 73% |

|            |                                                         |                                                                                                                                                       |       |                                      |                                                                                                                                                                                               |                                          |     |
|------------|---------------------------------------------------------|-------------------------------------------------------------------------------------------------------------------------------------------------------|-------|--------------------------------------|-----------------------------------------------------------------------------------------------------------------------------------------------------------------------------------------------|------------------------------------------|-----|
| LSB3       | neck cell periphery cytoplasm cytoskeleton mitochondria | cytoskeleton organization and biogenesis;actin cytoskeleton;                                                                                          | GTS1  | cytoplasm actin cytoskeleton nucleus | morphogenesis;mitotic cell cycle and cell cycle control;transcriptional activator;drug transport;stress response;rhythm ;cell growth ;cell aging;budding;development of asco;                 | 247-257                                  | 73% |
| LSB3       | neck cell periphery cytoplasm cytoskeleton mitochondria | cytoskeleton organization and biogenesis;actin cytoskeleton;                                                                                          | SLA1  | cytoplasm actin cytoskeleton nucleus | cell wall organization and biogenesis;assembly of protein complexes;protein binding;endocytosis;cell growth ;cell wall;actin cytoskeleton;budding;                                            | 192-202                                  | 83% |
| BZZ1       | cytoplasm actin cytoskeleton                            | response to stress;osmotic and salt stress response;osmosensing;actin cytoskeleton;                                                                   | MYO5  | actin cytoskeleton                   | cell wall organization and biogenesis;conversion to kinetic energy ;cytoskeleton;exocytosis;endocytosis;osmotic and salt stress response;osmosensing;budding;                                 | 1008-1018                                | 83% |
| BZZ1       | cytoplasm actin cytoskeleton                            | response to stress;osmotic and salt stress response;osmosensing;actin cytoskeleton;                                                                   | BCK1  | cytoplasm                            | mitotic cell cycle and cell cycle control;modification by phosphorylation;MAPKKK cascade;stress response;perception of nutrients and nutritional adaptation;directional cell growth ;budding; | 1394-1404                                | 83% |
| BZZ1       | cytoplasm actin cytoskeleton                            | response to stress;osmotic and salt stress response;osmosensing;actin cytoskeleton;                                                                   | ARK1  | cytoplasm actin cytoskeleton         | cytokinesis;phosphate utilization;modification by phosphorylation;assembly of protein complexes;endocytosis;actin cytoskeleton;budding;                                                       | 606-616                                  | 73% |
| BZZ1       | cytoplasm actin cytoskeleton                            | response to stress;osmotic and salt stress response;osmosensing;actin cytoskeleton;                                                                   | LAS17 | cytoplasm actin cytoskeleton         | cytokinesis;assembly of protein complexes;protein binding;endocytosis;osmotic and salt stress response;cell growth ;actin cytoskeleton;budding;                                               | 181-191                                  | 83% |
| BOI1       | bud neck cell periphery cytoplasm                       | signal transduction;lipid binding;small GTPase mediated signal transduction;cell growth ;cytoskeleton;budding;                                        | BCK1  | cytoplasm                            | mitotic cell cycle and cell cycle control;modification by phosphorylation;MAPKKK cascade;stress response;perception of nutrients and nutritional adaptation;directional cell growth ;budding; | 805-815                                  | 83% |
| BOI1       | bud neck cell periphery cytoplasm                       | signal transduction;lipid binding;small GTPase mediated signal transduction;cell growth ;cytoskeleton;budding;                                        | CDC54 | cytoplasm nucleus                    | DNA metabolism;DNA topology;ori recognition and priming complex formation;mitotic cell cycle and cell cycle control;ATP binding;                                                              | 680-690                                  | 83% |
| BOI1       | bud neck cell periphery cytoplasm                       | signal transduction;lipid binding;small GTPase mediated signal transduction;cell growth ;cytoskeleton;budding;                                        | RPO41 | mitochondria mitochondria            | organelle organization and biogenesis;transcription;DNA synthesis and replication;general transcription activities;DNA binding;mitochondrion;                                                 | 828-838                                  | 73% |
| BOI1       | bud neck cell periphery cytoplasm                       | signal transduction;lipid binding;small GTPase mediated signal transduction;cell growth ;cytoskeleton;budding;                                        | LAS17 | cytoplasm actin cytoskeleton         | cytokinesis;assembly of protein complexes;protein binding;endocytosis;osmotic and salt stress response;cell growth ;actin cytoskeleton;budding;                                               | 310-320<br>321-331<br>348-358<br>381-391 | 83% |
| BOI1       | bud neck cell periphery cytoplasm                       | signal transduction;lipid binding;small GTPase mediated signal transduction;cell growth ;cytoskeleton;budding;                                        | STE20 | bud cytoplasm                        | pseudohyphal growth;modification by phosphorylation;transmembrane signal transduction;pheromone response;cell growth ;cytoskeleton;budding;                                                   | 473-483                                  | 83% |
| BOI1       | bud neck cell periphery cytoplasm                       | signal transduction;lipid binding;small GTPase mediated signal transduction;cell growth ;cytoskeleton;budding;                                        | BOI2  | bud neck cell periphery cytoplasm    | signal transduction;lipid binding;small GTPase mediated signal transduction;cell growth ;cytoskeleton;budding;                                                                                | 439-449                                  | 73% |
| RVS16<br>7 | actin cytoskeleton                                      | vesicle-mediated transport;response to stress;budding;protein binding;endocytosis;osmotic and salt stress response;cell growth ;cytoskeleton;budding; | ABP1  | cytoplasm actin cytoskeleton         | cytoskeleton organization and biogenesis;assembly of protein complexes;protein binding;cell growth ;actin cytoskeleton;budding;                                                               | 515-525                                  | 73% |

|            |                                               |                                                                                                                                                                             |         |                                                    |                                                                                                                                                                                                                                                                |                                          |     |
|------------|-----------------------------------------------|-----------------------------------------------------------------------------------------------------------------------------------------------------------------------------|---------|----------------------------------------------------|----------------------------------------------------------------------------------------------------------------------------------------------------------------------------------------------------------------------------------------------------------------|------------------------------------------|-----|
| RVS16<br>7 | actin<br>cytoskeleton                         | vesicle-mediated<br>transport;response to<br>stress;budding;protein<br>binding;endocytosis;osmotic and<br>salt stress response;cell growth<br>;cytoskeleton;budding;        | APP1    | cytoplasm actin<br>cytoskeleton<br>nucleus         | cytoskeleton organization and<br>biogenesis;cell growth ;actin<br>cytoskeleton;budding;                                                                                                                                                                        | 505-515                                  | 83% |
| RVS16<br>7 | actin<br>cytoskeleton                         | vesicle-mediated<br>transport;response to<br>stress;budding;protein<br>binding;endocytosis;osmotic and<br>salt stress response;cell growth<br>;cytoskeleton;budding;        | LAS17   | cytoplasm actin<br>cytoskeleton                    | cytokinesis;assembly of protein<br>complexes;protein<br>binding;endocytosis;osmotic and<br>salt stress response;cell growth<br>;actin cytoskeleton;budding;                                                                                                    | 341-351<br>384-394<br>384-394            | 83% |
| RVS16<br>7 | actin<br>cytoskeleton                         | vesicle-mediated<br>transport;response to<br>stress;budding;protein<br>binding;endocytosis;osmotic and<br>salt stress response;cell growth<br>;cytoskeleton;budding;        | YDL146W | bud neck cell<br>periphery<br>cytoplasm<br>nucleus | -                                                                                                                                                                                                                                                              | 477-487                                  | 73% |
| MYO3       | cytoplasm<br>actin<br>cytoskeleton            | cell wall organization and<br>biogenesis;conversion to kinetic<br>energy<br>;cytoskeleton;exocytosis;endocyt<br>osis;osmotic and salt stress<br>response;cell wall;budding; | SRV2    | cell periphery<br>actin<br>cytoskeleton            | cytoskeleton organization and<br>biogenesis;metabolism of cyclic<br>and unusual nucleotides;protein<br>binding;small GTPase mediated<br>signal transduction;cell<br>growth;budding;                                                                            | 276-286                                  | 83% |
| MYO3       | cytoplasm<br>actin<br>cytoskeleton            | cell wall organization and<br>biogenesis;conversion to kinetic<br>energy<br>;cytoskeleton;exocytosis;endocyt<br>osis;osmotic and salt stress<br>response;cell wall;budding; | FAR11   | ambiguous                                          | cell cycle;conjugation;pheromone<br>response;                                                                                                                                                                                                                  | 520-530                                  | 73% |
| MYO3       | cytoplasm<br>actin<br>cytoskeleton            | cell wall organization and<br>biogenesis;conversion to kinetic<br>energy<br>;cytoskeleton;exocytosis;endocyt<br>osis;osmotic and salt stress<br>response;cell wall;budding; | BNI1    | neck neck<br>cytoplasm<br>cytoskeleton             | response to<br>stress;budding;cytokinesis ;spindle<br>pole body;protein binding;structural<br>protein;RNA transport;small<br>GTPase mediated signal<br>transduction;osmotic and salt stress<br>response;pheromone response;cell<br>growth ;actin cytoskeleton; | 1238-1248<br>1277-1287                   | 83% |
| MYO3       | cytoplasm<br>actin<br>cytoskeleton            | cell wall organization and<br>biogenesis;conversion to kinetic<br>energy<br>;cytoskeleton;exocytosis;endocyt<br>osis;osmotic and salt stress<br>response;cell wall;budding; | VRP1    | cytoplasm actin<br>cytoskeleton                    | vesicle-mediated transport;response<br>to stress;budding;protein<br>binding;endocytosis;osmotic and<br>salt stress response;cell growth<br>;actin cytoskeleton;                                                                                                | 4-14<br>234-244<br>395-405               | 83% |
| MYO3       | cytoplasm<br>actin<br>cytoskeleton            | cell wall organization and<br>biogenesis;conversion to kinetic<br>energy<br>;cytoskeleton;exocytosis;endocyt<br>osis;osmotic and salt stress<br>response;cell wall;budding; | BNR1    | neck cell<br>periphery actin<br>cytoskeleton       | response to stress;budding;protein<br>binding;osmotic and salt stress<br>response;cell growth ;actin<br>cytoskeleton;                                                                                                                                          | 765-775<br>819-829                       | 83% |
| PIN3       | cytoplasm<br>nucleus                          | cytoskeleton organization and<br>biogenesis;actin cytoskeleton;                                                                                                             | APP1    | cytoplasm actin<br>cytoskeleton<br>nucleus         | cytoskeleton organization and<br>biogenesis;cell growth ;actin<br>cytoskeleton;budding;                                                                                                                                                                        | 506-516                                  | 83% |
| PIN3       | cytoplasm<br>nucleus                          | cytoskeleton organization and<br>biogenesis;actin cytoskeleton;                                                                                                             | LAS17   | cytoplasm actin<br>cytoskeleton                    | cytokinesis;assembly of protein<br>complexes;protein<br>binding;endocytosis;osmotic and<br>salt stress response;cell growth<br>;actin cytoskeleton;budding;                                                                                                    | 324-334<br>342-352<br>353-363<br>385-395 | 83% |
| PIN3       | cytoplasm<br>nucleus                          | cytoskeleton organization and<br>biogenesis;actin cytoskeleton;                                                                                                             | GTS1    | cytoplasm actin<br>cytoskeleton<br>nucleus         | cell cycle;morphogenesis;mitotic<br>cell cycle and cell cycle<br>control;transcriptional<br>activator;drug transport;stress<br>response;rhythm ;cell growth ;cell<br>aging;budding;development of<br>asco;                                                     | 248-258                                  | 73% |
| PIN3       | cytoplasm<br>nucleus                          | cytoskeleton organization and<br>biogenesis;actin cytoskeleton;                                                                                                             | YDL146W | bud neck cell<br>periphery<br>cytoplasm<br>nucleus | -                                                                                                                                                                                                                                                              | 478-488                                  | 73% |
| SLA1       | cytoplasm<br>actin<br>cytoskeleton<br>nucleus | cell wall organization and<br>biogenesis;assembly of protein<br>complexes;protein<br>binding;endocytosis;cell growth<br>;cell wall;actin<br>cytoskeleton;budding;           | LAS17   | cytoplasm actin<br>cytoskeleton                    | cytokinesis;assembly of protein<br>complexes;protein<br>binding;endocytosis;osmotic and<br>salt stress response;cell growth<br>;actin cytoskeleton;budding;                                                                                                    | 319-328<br>346-355<br>379-388            | 83% |

|      |                                               |                                                                                                                                                                   |       |               |                                                                                                                                                                                  |         |     |
|------|-----------------------------------------------|-------------------------------------------------------------------------------------------------------------------------------------------------------------------|-------|---------------|----------------------------------------------------------------------------------------------------------------------------------------------------------------------------------|---------|-----|
| SLA1 | cytoplasm<br>actin<br>cytoskeleton<br>nucleus | cell wall organization and<br>biogenesis;assembly of protein<br>complexes;protein<br>binding;endocytosis;cell growth<br>;cell wall;actin<br>cytoskeleton;budding; | STE20 | bud cytoplasm | pseudohyphal growth;phosphate<br>utilization;modification by<br>phosphorylation;transmembrane<br>signal transduction;pheromone<br>response;cell growth<br>;cytoskeleton;budding; | 471-480 | 83% |
|------|-----------------------------------------------|-------------------------------------------------------------------------------------------------------------------------------------------------------------------|-------|---------------|----------------------------------------------------------------------------------------------------------------------------------------------------------------------------------|---------|-----|

## References

Dolinski, K., Balakrishnan, R., Christie, K. R., Costanzo, M. C., Dwight, S. S., Engel, S. R., Fisk, D. G., Hirschman, J. E., Hong, E. L., Nash, R., Oughtred, R., Theesfeld, C. L., Binkley, G., Lane, C., Schroeder, M., Sethuraman, A., Dong, S., Weng, S., Miyasato, S., Andrada, R., Botstein, D., and Cherry, J. M. "Saccharomyces Genome Database" UP<ftp://ftp.yeastgenome.org/yeast/>UP

Mewes, H. W., D. Frishman, et al. (2000). "MIPS: a database for genomes and protein sequences." Nucleic Acids Res **28**(1): 37-40.
